# Supplementary material for: Mitigating Bias in Algorithmic Systems—A Fish-eye View
Source: Atypon-hosted journal article supplement (doi:10.1145/3527152), 2022-12-03
Supplement: 3527152.supp.pdf [file 3527152.supp.pdf]

# Supplementary Material for: Mitigating Bias in Algorithmic Systems—A Fish-eye View

KALIA ORPHANOU, Open University of Cyprus

JAHNA OTTERBACHER and STYLIANI KLEANTHOUS, Open University of Cyprus & CYENS  
Centre of Excellence

KHUYAGBAATAR BATSUREN, National University of Mongolia

FAUSTO GIUNCHIGLIA, The University of Trento

VERONIKA BOGINA, AVITAL SHULNER TAL, ALAN HARTMAN, and TSVI KUFLIK,  
The University of Haifa

---

## 1 SUPPLEMENTARY MATERIALS

Table 7 summarizes the methods used for auditing and discrimination discovery within each of the research domains analyzed in this survey. In ML systems, bias detection is mostly done using discrimination or fairness metrics. Auditing in ML systems can be achieved by auditing software tools or when *developers/regulators* act as auditors of the algorithmic system. However, in IR, HCI, and RecSys systems, *users* often act as auditors by submitting different queries in search engines and social networks or by taking the role of crowdworker in the crowdsourcing conducted studies. Discrimination discovery approaches used in IR, HCI, and RecSys systems are similar to auditing but with a more concrete methodology on detecting bias.

Table 8 summarizes the methods used for fairness management within each of the research domains analyzed in this survey. In ML algorithmic systems, the most popular techniques are data re-sampling, removal of sensitive attributes and data transformation to mitigate bias in the data, optimization and regularization approaches to mitigate bias during the model training and re-labeling of the outcome decision to mitigate bias on the output of the system. In ranking systems such as RecSys and IR, the most popular approaches are re-sampling for mitigating data bias, learning to rank methods to mitigate bias in the ranking algorithms and re-ranking methods as for modifying the ranking outcomes. Two approaches that are common in RecSys and ML communities are the data transformation (fairness pre-processing) and optimization approaches (fairness in-processing). In the HCI community, since the *user* is the main stakeholder, most of the papers examine the user perception on fairness. Approaches to mitigate bias referred to the use of a human-in-the-loop on the decision-making [22]. Fairness certification techniques use fairness constraints or defining new fairness notions, i.e., counterfactual fairness and metrics for certifying the fairness of systems in all the four research domains. In IR, some studies also use user evaluation to certify the fairness of the system.

Table 9 provides a comparison of the solutions focusing on Explainability Management. Explainability approaches have primarily been developed in the context of ML algorithms and systems. The best known methods for explaining the model decision-making process use interpretable models to mimic the behavior of black-box models, i.e., decision trees, decision rules, and ontologies.

---

Table 7. Comparison of Discrimination Detection Approaches Across the Four Domains

| Domain                | Problem                                                       | Solution Space           | Reference(s)                                                                                                                     |
|-----------------------|---------------------------------------------------------------|--------------------------|----------------------------------------------------------------------------------------------------------------------------------|
| <b>Bias Detection</b> |                                                               |                          |                                                                                                                                  |
| ML                    | Data/Model                                                    | Auditing                 | Automatic auditing tool [14, 174]<br>Developers as auditors [24, 130, 226]<br>Discrimination/Fairness metrics [98, 222, 233]     |
|                       | Data<br>Data<br>Data/Model/Output                             | Discrimination Discovery | Metrics [56, 125, 154]<br>ML methods<br>[43, 49, 123, 157, 226, 234]                                                             |
| IR                    | User/Data/Output                                              | Auditing                 | Submit queries to search engines/Twitter<br>[92, 105, 119, 122, 132, 147, 204]                                                   |
|                       | Model/User<br>User/Data/Output                                | Discrimination Discovery | Sock-puppet auditing [6]<br>Analysis of Web logs<br>[13, 35, 94, 150, 208, 211–213, 221]                                         |
|                       | User/Data/Output<br>User/Third Party/Data<br>User/Third Party |                          | Word embedding [66, 95, 164]<br>Crowdsourcing studies [59, 127]<br>Direct discrimination of perceived bias<br>[10, 96, 209, 210] |
| HCI                   | Output/Model/User                                             | Auditing                 | Analysing system behavior<br>[101, 135]                                                                                          |
|                       | Data/User/Third Party                                         | Discrimination Discovery | Crowdsourcing studies<br>[11, 48, 78, 139, 161]                                                                                  |
|                       | Model/User<br>Data/User                                       |                          | Use of ML methods [89, 178]<br>Data-driven personas [175]                                                                        |
| RecSys                | Data/User                                                     | Auditing                 | Developers as auditors<br>[57, 62]                                                                                               |
|                       | Model/User<br>User/Model/Output                               | Discrimination Discovery | Sock-puppet auditing [6]<br>Discrimination detection in advertising<br>recommendation systems [2, 188, 192]                      |
|                       | Output/Model                                                  |                          | Discrimination detection in evaluation metrics<br>[15, 60]                                                                       |
|                       | Output/User                                                   |                          | Discrimination in social networks [34]                                                                                           |

Methods for explaining the decision outcome include feature-relevance, local and global explainability, and visualization methods. There is also a growing literature on explainability within the HCI community. These works suggest that explainability, and judgement of the outcome or decision of the system should be provided to enhance the trust of the end user in the system. Also in HCI, we found a few works that connect explainability to fairness perception. Finally, explainability approaches have also been widely discussed in RecSys and IR systems. The difference between these approaches and the ones used in ML are that they take into consideration the user's perception and have the specific goal of increasing the trust of the end user in the system. The most popular explainability techniques in the RecSys and IR literature are the visualization methods (outcome explainability) that have been applied to justify the ranking results.

Table 8. Comparison of Fairness Management Methods in the Different Domains

| Fairness Management |                                                                             |                                                                              |                                                                                                                                                                                                                                            |
|---------------------|-----------------------------------------------------------------------------|------------------------------------------------------------------------------|--------------------------------------------------------------------------------------------------------------------------------------------------------------------------------------------------------------------------------------------|
| Domain              | Problem                                                                     | Solution Space                                                               | Reference(s)                                                                                                                                                                                                                               |
| ML                  | Data                                                                        | Fairness Pre-processing                                                      | Removal of protected attributes & Data Transformation [26, 100, 158, 224]<br>Causal BN [121, 226]<br>Data Re-labeling [65, 102]<br>Re-sampling methods [101, 182]                                                                          |
|                     | Model                                                                       | Fairness In-processing                                                       | Regularization approach [103, 219]<br>Optimization approach [144, 173]<br>Constraints [165]                                                                                                                                                |
|                     | Model/Output<br>Third Party/Output<br>User/Third Party<br>Data/Model/Output | Fairness Post-processing<br>Fairness Perception<br>Fairness Certification    | Counterfactual fairness [120]<br>Altering of labels [84, 102, 157]<br>[134, 189]<br>Fairgroups [64]<br>Counterfactual Fairness [109, 182]<br>Techno-moral graphs [97]<br>Fairness Constraints/Metrics [31, 46, 52, 79, 108, 111, 216, 225] |
| IR                  | Data<br>Model                                                               | Fairness Pre-processing<br>Fairness In-processing                            | Data sampling [51, 53, 76, 184]<br>Learn-to-rank methods [47, 117, 149, 220]                                                                                                                                                               |
|                     | Output<br>Model/Output/User<br>User/Output                                  | Fairness Post-processing<br>Fairness Certification<br>Fairness Perception    | Re-ranking [104, 110, 118, 126]<br>[61, 90, 141]<br>[136, 152]                                                                                                                                                                             |
|                     | Data                                                                        | Fairness Pre-processing                                                      | Data sampling [101]                                                                                                                                                                                                                        |
| HCI                 | Output<br>User/Output<br>Output/User                                        | Fairness Perception<br>Fairness Certification                                | Data transformation [32]<br>Human-in-the-loop [22]<br>Metrics [206]<br>[124, 214]                                                                                                                                                          |
|                     | Data                                                                        | Fairness Pre-processing                                                      | Data sampling [25, 104, 130]<br>Data transformation [215]                                                                                                                                                                                  |
|                     | Model/Output<br>Model<br>Output<br>Model/Output                             | Fairness In-processing<br>Fairness Post-processing<br>Fairness Certification | Optimization approaches [138, 217]<br>Learn-to-rank [117, 220]<br>Re-ranking [104, 155, 186, 223]<br>Metrics [106]                                                                                                                         |

Table 9. Comparison of Explainability Management Approaches for the Different Research Domains

| <b>Explainability Management</b> |                |                        |                                                                                            |
|----------------------------------|----------------|------------------------|--------------------------------------------------------------------------------------------|
| <b>Domain</b>                    | <b>Problem</b> | <b>Solution Space</b>  | <b>Reference(s)</b>                                                                        |
| ML                               | Model          | Model Explainability   | Use of decision tree<br>[38, 54, 74, 115, 177, 193, 230]                                   |
|                                  | Model          |                        | Use of decision rules<br>[44, 99, 128]                                                     |
|                                  | Model          |                        | Ontologies [19, 42, 166]                                                                   |
|                                  | Output         | Outcome Explainability | Local explanations<br>[167, 168, 200]                                                      |
|                                  | Output/User    |                        | Visualization methods<br>[17, 67, 180, 185, 218, 230, 232]                                 |
|                                  | Output/User    |                        | Counterfactual explanations [182, 206]<br>Feature-relevance explanations [1, 87, 187, 203] |
| IR                               | Output/User    | Outcome Explainability | Global explainaions [9]                                                                    |
| HCI                              | User/Data      | Model Explainability   | Data-centric explanations [5]                                                              |
|                                  | Output/Data    | Outcome Explainability | Feature-relevance explanation [91]                                                         |
|                                  | User/Output    |                        | Taxonomy of explanations & Styles [16, 58, 69]                                             |
|                                  | User/Output    |                        | Raise user awareness [162]                                                                 |
| RecSys                           | Model/User     | Model Explainability   | Taxonomy of concepts [145]                                                                 |
|                                  | Model/User     |                        | Based on user opinions [37, 205]                                                           |
|                                  | Output/User    |                        | Personalized explanations [151]                                                            |
|                                  | Output/User    |                        | Knowledge graph [29, 86]                                                                   |
|                                  | Output/User    | Output Explainability  | Visualization methods [20, 114, 198, 201]                                                  |
